# Supplementary material
Source: PubMed Central journal article supplement (PMC10335836)
Supplement: NIHMS1910904-supplement-Supplementary_figures_and_tables.pdf [file NIHMS1910904-supplement-Supplementary_figures_and_tables.pdf]

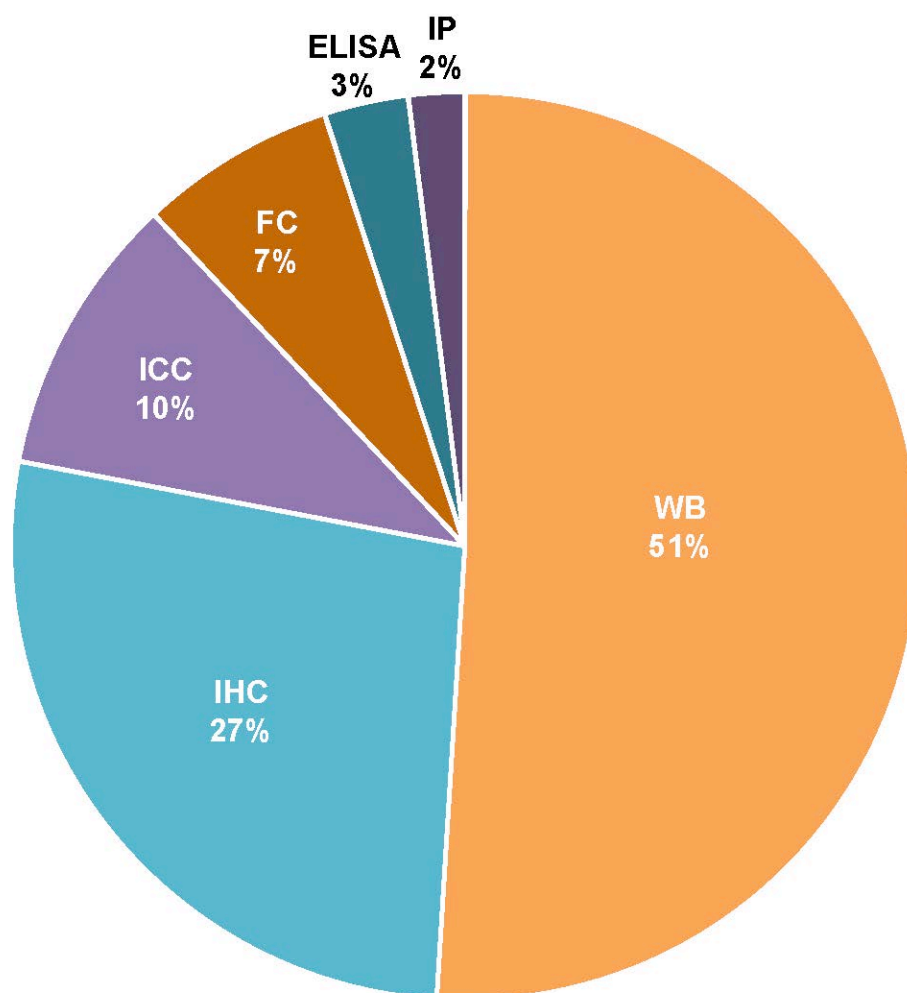

### Supplementary Figure 1

Utilization of publicly available antibodies in different applications.

The fraction of publicly available antibodies toward human protein targets is shown with data for the following applications: Western blotting (WB), immunohistochemistry (IHC), immunocytochemistry (ICC), flow cytometry (FC), immunosorbent assays (ELISA), and immunoprecipitation (IP). The numbers are based on information from users and providers reported to the resource portal Antibodypedia<sup>7</sup>.

**Supplementary Table 1.** Protein handling and conditions in various applications

| <b>Antibody application</b>               | <b>Protein handling (typical)</b> | <b>Description</b>                                                                                                                                                                                 |
|-------------------------------------------|-----------------------------------|----------------------------------------------------------------------------------------------------------------------------------------------------------------------------------------------------|
| Western blotting                          | Denaturing conditions             | Proteins are treated with detergent (sodium dodecyl sulfate) but might be partially refolded when blotted onto filter                                                                              |
| Immunohistochemistry                      | Denaturing conditions             | Proteins are often cross-linked with formalin and treated with high temperatures (such as 115 degrees Celsius) at elevated pressures (epitope retrieval)                                           |
| Immunocytochemistry                       | Denaturing conditions             | Cellular proteins are normally fixed and often permeabilization is needed. Organic solvents (such as alcohols and acetone) or cross-linking reagents (such as paraformaldehyde) are typically used |
| Immunoprecipitation (IP) and chromatin IP | Native conditions                 | Lysis buffers are often used to stabilize native protein conformation, inhibit protease activity, and allow the protein to be released from the cell or tissue                                     |
| Sandwich assays                           | Native conditions                 | Blood samples (plasma and serum) are normally not pre-treated with denaturing agents, whereas tissue samples are normally treated with lysis buffers                                               |
| Flow cytometry                            | Native conditions                 | Cells are normally not pre-treated with denaturing agents when extracellular markers are used, but permeabilization might be used for intracellular markers                                        |
| Reverse phase protein arrays              | Native conditions                 | Blood samples (plasma and serum) are normally not pre-treated with denaturing agents, whereas tissue samples are often treated with lysis buffers                                                  |

**Supplementary Table 2.** Additional methods used for general characterization of antibodies

| <b>Type of characterization</b> | <b>Description</b>                                                     | <b>Method used</b>                     |
|---------------------------------|------------------------------------------------------------------------|----------------------------------------|
| Affinity measurements           | Determines binding parameters of an antibody for its target            | Surface plasmon resonance              |
| Epitope mapping                 | Determines the site on the target protein where the antibody binds     | Peptide arrays, display, alanine scans |
| Isotype determination           | Characterizes an antibody by Fc region of heavy chain                  | Immunoassay                            |
| Sequence determination          | Determines the DNA sequence of the complementary region of an antibody | DNA sequencing techniques              |
| Adsorption                      | Antibody is pre-treated with antigen before assay                      | Immunohistochemistry                   |
| Array-based specificity         | Specific binding versus cross-reactivity                               | Protein or peptide array               |

**Supplementary Table 3.** Relevant references for antibody use and validation

| Category                                                      | Authors                          | Description                                                                                                                                                                              | PMID     |
|---------------------------------------------------------------|----------------------------------|------------------------------------------------------------------------------------------------------------------------------------------------------------------------------------------|----------|
| <b>References for Antibody Validation and Reproducibility</b> |                                  |                                                                                                                                                                                          |          |
| <b>Antibody Reproducibility</b>                               | Bandrowski <i>et al.</i> , 2016  | Discusses an initiative (RRIDs) to improve reproducibility through unique identifiers for antibodies, model organisms, and tools that are machine-readable and stable                    | 26599696 |
|                                                               | Bjorling <i>et al.</i> , 2008    | Describes a database that assigns publicly available antibodies a validation score based on experimental evidence in an application-specific manner                                      | 18667413 |
|                                                               | Bordeaux <i>et al.</i> , 2010    | A review on antibody validation, highlighting the common pitfalls when working with antibodies, common practices for validating antibodies, and levels of commercial antibody validation | 20359301 |
|                                                               | Bourbellion <i>et al.</i> , 2010 | Addresses the need for a formal set of standards to report affinity binder reagents and improve reproducibility (MIAPAR)                                                                 | 20622827 |
|                                                               | Vasilevsky <i>et al.</i> , 2013  | Raises the issue of researchers failing to properly reference the affinity reagents used in an experiment (ie, the catalog number and antibody supplier name)                            | 24032093 |
| <b>Western blotting</b>                                       | Gilda <i>et al.</i> , 2015       | Discusses the technical variability observed for antibodies used in Western blotting and proposes establishment of a reporting standard                                                  | 26287535 |
| <b>Immunohistochemistry</b>                                   | Deutsch <i>et al.</i> , 2008     | Describes guidelines for minimum level of information to be reported in gene expression localization experiments (MISFISHIE)                                                             | 18327244 |
|                                                               | Hewitt <i>et al.</i> , 2014      | Summarizes the necessary controls for validating immunohistochemical data and offers a standard of practice for using IHC in research and diagnostic investigations                      | 25023613 |
|                                                               | Howat <i>et al.</i> , 2014       | Guidelines for a stepwise approach to validate antibodies for immunohistochemical assays                                                                                                 | 24525140 |
|                                                               | O'Hurley <i>et al.</i> , 2014    | Evaluates challenges faced by the use of immunohistochemical biomarkers and the strategies available for validation of antibodies                                                        | 24725481 |
|                                                               | Ramos-Vara <i>et al.</i> , 2014  | Highlights technical aspects of IHC and the importance of the antibody-antigen specificity                                                                                               | 24129895 |

|                                            |                                  |                                                                                                                                                                                                                     |                                                                                                                                     |
|--------------------------------------------|----------------------------------|---------------------------------------------------------------------------------------------------------------------------------------------------------------------------------------------------------------------|-------------------------------------------------------------------------------------------------------------------------------------|
|                                            | Schuster <i>et al.</i> , 2012    | Combines Western blotting and IHC to validate the specificity of 32 antibodies used in research, and found 19 that showed reliable specificity                                                                      | 22393911                                                                                                                            |
| <b>Immunocytochemistry</b>                 | Holmseth <i>et al.</i> , 2012    | Addresses the ramifications of certain assay controls that may interfere with accurate testing                                                                                                                      | 22215633                                                                                                                            |
|                                            | MIACA v.080404                   | Draft outlining standards for cell-based functional assays                                                                                                                                                          | N/A                                                                                                                                 |
|                                            | Stadler <i>et al.</i> , 2012     | Describes a platform that combines RNA interference (RNAi) and immunofluorescence to validate antibody binding and subcellular localization of a protein                                                            | 22361696                                                                                                                            |
| <b>Flow cytometry</b>                      | Lee <i>et al.</i> , 2008         | MIFlowCyt is a set of standards describing the minimum requirements for the reporting of flow cytometry experiments                                                                                                 | 18752282                                                                                                                            |
| <b>Immunoprecipitation</b>                 | Marcon <i>et al.</i> , 2015      | Describes the standard operating procedure for an MS-based approach to measure antibody quality for IP and includes detailed protocols                                                                              | 26121405                                                                                                                            |
| <b>Chromatin immunoprecipitation</b>       | Landt <i>et al.</i> , 2012       | Describes how the ENCODE and modENCODE consortia can address antibody validation, experimental replication, sequencing depth, data and metadata reporting, and data quality assessment when analyzing ChIP-seq data | 22955991                                                                                                                            |
|                                            | ENCODE                           | The ENCODE website includes antibody characterization standards for transcription factors (updated May 2016) and chromatin remodelers and modifiers (updated Aug 2015)                                              | <a href="https://www.encodeproject.org/about/experiment-guidelines/">https://www.encodeproject.org/about/experiment-guidelines/</a> |
| <b>Reverse phase protein arrays</b>        | Jeong <i>et al.</i> , 2012       | Describes a platform using a full-length protein microarray to screen for monoclonal antibodies with the highest specificity                                                                                        | 22307071                                                                                                                            |
|                                            | Sjöberg <i>et al.</i> , 2016     | Validation of antibodies for use in protein microarrays                                                                                                                                                             | 26417875                                                                                                                            |
| <b>RNA interference and genome editing</b> | Olds and Li, 2016                | Describes the use of siRNAs to validate antibodies                                                                                                                                                                  | 26998240                                                                                                                            |
| <b>Mass spectrometry</b>                   | MIARE Reporting Checklist v0.8.0 | A guide to ensure data reporting of RNAi experiments is publicly accessible                                                                                                                                         | N/A                                                                                                                                 |

|                                                            |                                         |                                                                                                                                        |          |
|------------------------------------------------------------|-----------------------------------------|----------------------------------------------------------------------------------------------------------------------------------------|----------|
|                                                            | Martinez-Bartolome <i>et al.</i> , 2013 | Discusses the current approaches and guidelines for reporting quantitative MS                                                          | 23500130 |
|                                                            | MIAPE-Quant v1.0                        | Outlines the minimum information required to report the use of quantification techniques in proteomics experiments                     | N/A      |
| <b>IMS</b>                                                 | Marcon <i>et al.</i> , 2015             | Describes the standard operating procedure for an MS-based approach to measure antibody quality for IP                                 | 26121405 |
|                                                            | MIAPE-MS v2.98                          | Outlines the minimum information required to report the use of MS in proteomics experiments                                            | N/A      |
| <b>References for Technical and Supporting Information</b> |                                         |                                                                                                                                        |          |
| <b>Western blotting</b>                                    | Mahmood <i>et al.</i> , 2012            | Considerations for designing Western blot experiments, including the technique, theory, and troubleshooting approaches                 | 23050259 |
| <b>Immunohistochemistry</b>                                | Schacht <i>et al.</i> , 2015            | Describes the basic protocol for performing immunohistochemistry with an emphasis on dermatology                                       | 25666678 |
| <b>Immunocytochemistry</b>                                 | Burry <i>et al.</i> , 2011              | Describes a new classification of immunocytochemical controls                                                                          | 20852036 |
|                                                            | Waters <i>et al.</i> , 2009             | Guidelines on digital image acquisition during quantitative fluorescent microscopy                                                     | 19564400 |
| <b>Flow cytometry</b>                                      | Hulspas <i>et al.</i> , 2009            | Discusses the major causes of background readings in flow cytometric measurements and the approaches that can improve reliability      | 19575390 |
|                                                            | Kalina <i>et al.</i> , 2012             | Flow cytometer setting standards and immunophenotyping protocols determined by the EU-supported EuroFlow Consortium                    | 22948490 |
| <b>Immunoprecipitation</b>                                 | Marcon <i>et al.</i> , 2015             | Describes the standard operating procedure for an MS-based approach to measure antibody quality for IP and includes detailed protocols | 26121405 |
| <b>Sandwich assays</b>                                     | Cox <i>et al.</i> , 2012                | Provides an essential overview of the design principles for implanting robust and automation-friendly assays in immunoassay formats    | NBK92434 |
| <b>Reverse phase protein arrays</b>                        | Akbani <i>et al.</i> , 2014             | A gathering of insights from three RPPA workshops highlighting current knowledge and future directions                                 | 24777629 |

|                          |                                         |                                                                                                                                                                                              |          |
|--------------------------|-----------------------------------------|----------------------------------------------------------------------------------------------------------------------------------------------------------------------------------------------|----------|
| <b>Genome editing</b>    | Singh <i>et al.</i> , 2015              | A review on usage of the CRISPR-Cas9 system for the study of mouse genetics                                                                                                                  | 25271304 |
| <b>Mass spectrometry</b> | Abbatiello <i>et al.</i> , 2015         | Large-scale inter-laboratory study applying multiplexed quantitative peptide assays to detect proteins in biological samples                                                                 | 25693799 |
|                          | Faupel-Badger <i>et al.</i> , 2010      | Describes the use of liquid chromatography (LC)-MS/MS as a more accurate method of protein quantification than sandwich assays                                                               | 20056650 |
|                          | Liebler <i>et al.</i> , 2013            | Discusses the sensitivity, precision, and quantitation of multiple-reaction monitoring MS and its applications                                                                               | 23517332 |
|                          | Martinez-Bartolome <i>et al.</i> , 2013 | Discusses the current approaches and guidelines for reporting quantitative MS                                                                                                                | 23500130 |
|                          | Peterson <i>et al.</i> , 2012           | Describes parallel reaction monitoring as an improved alternative targeted proteomics approach over selected reaction monitoring                                                             | 22865924 |
|                          | Picotti <i>et al.</i> , 2012            | Selected reaction monitoring as a reliable platform for assessing proteins across multiple samples                                                                                           | 22669653 |
| <b>IMS</b>               | Edfors <i>et al.</i> , 2014             | Application of immuno-SILAC for quantification of proteins in complex samples – based on polyclonal antibodies and stable isotope-labeled recombinant protein fragments prior to MS analysis | 24722731 |
|                          | Marcon <i>et al.</i> , 2015             | Describes the standard operating procedure for an MS-based approach to measure antibody quality for IP                                                                                       | 26121405 |
| <b>Proximity assays</b>  | Assarsson <i>et al.</i> , 2014          | Describes use of proximity extension assays in multiplex protein quantification assays and includes protocols                                                                                | 24755770 |
|                          | Ebai <i>et al.</i> , 2015               | Describes procedures for developing solid phase proximity ligation assays                                                                                                                    | 25559104 |
|                          | Lundberg <i>et al.</i> , 2011           | Study combines proximity extension assay with antibody specificity to detect low-abundance proteins in plasma samples                                                                        | 21646338 |
